# Supplementary material for: Unambiguous identification of N-containing oxygenated organic molecules using CI-Orbitrap in an eastern Chinese megacity
Source: Copernicus journal article supplement (doi:10.5194/acp-2022-774), 2022-11-17
Supplement: Supplementary file [file acp-2022-774-AC2-supplement.zip]

# Unambiguous identification of N-containing oxygenated organic molecules using CI-Orbitrap in an eastern Chinese megacity

Yiqun Lu<sup>1,2</sup>, Yingge Ma<sup>1</sup>, Dan Dan Huang<sup>1</sup>, Shengrong Lou<sup>1</sup>, Sheng'ao Jing<sup>1</sup>, Yaqin Gao<sup>1</sup>, Hongli Wang<sup>1</sup>, Yanjun Zhang<sup>3</sup>, Hui Chen<sup>4</sup>, [Yunhua Chang<sup>5</sup>](#), Naiqiang Yan<sup>2</sup>, Jianmin Chen<sup>4</sup>, Christian George<sup>3</sup>, Matthieu Riva<sup>3</sup>, Cheng Huang<sup>1\*</sup>

<sup>1</sup> State Environmental Protection Key Laboratory of Formation and Prevention of Urban Air Pollution Complex, Shanghai Academy of Environmental Sciences, Shanghai 200233, China;

<sup>2</sup> School of Environmental Science and Engineering, Shanghai Jiao Tong University, Shanghai 200240, China

<sup>3</sup> Univ. Lyon, Université Claude Bernard Lyon1, CNRS, IRCELYON, 69626 Villeurbanne, France;

<sup>4</sup> Shanghai Key Laboratory of Atmospheric Particle Pollution and Prevention (LAP<sup>3</sup>), Department of Environmental Science & Engineering, Jiangwan Campus, Fudan University, Shanghai 200438, China

<sup>5</sup> [Collaborative Innovation Center on Forecast and Evaluation of Meteorological Disasters \(CIC-FEMD\), NUIST Center on Atmospheric Environment, Nanjing University of Information Science and Technology, Nanjing 210044, China](#)

Corresponding authors: Cheng Huang (huangc@saes.sh.cn)

## ABSTRACT

Oxygenated organic molecules (OOMs) are dominated by the N-containing species in polluted urban environment. As N-containing OOMs, especially those with more than one nitrogen atoms, prevailed in the high  $m/z$  range ( $m/z > 350$ Th), unambiguous identification of N-containing OOMs is highly desirable for understanding of their formation processes, precursors and influencing factors. To achieve this, we applied an ultra-high-resolution chemical ionization-orbitrap (CI-Orbitrap) in a field campaign and found that OOMs contain one (1N-OOMs), two (2N-OOMs) and three (3N-OOMs) nitrogen atoms respectively comprised 50%, 26% and 4% of total OOMs. More interestingly, the fraction of 2N-OOMs increased with the increase of carbon number ( $nC$ ) and were dominated by the ones derived from aliphatic precursors (2N-OOM<sub>Ali</sub>, 64.2%), indicating the importance of multistep oxidation. Plausible precursors of 2N-OOMs were aliphatics (2N-OOM<sub>Ali</sub>, 64.2%), aromatics (2N-OOM<sub>Aro</sub>, 16%), and monoterpenes (2N-OOM<sub>MT</sub>, 15.4%). The absolute concentrations of 2N-OOMs were greatly affected by the pollution level for the most cases. The 2N-OOM<sub>Ali</sub> was the most abundant 2N-OOMs and its fraction even increased in the polluted day with enhanced proportion of the ones with  $nC > 10$ . While 2N-OOM<sub>Ali</sub> and 2N-OOM<sub>Aro</sub> were dominated by daytime photochemical production, nighttime NO<sub>3</sub>-initiated oxidation played a comparable role as the daytime photochemistry in the formation of 2N-OOM<sub>MT</sub>. 2N-OOM<sub>Aro</sub> were of highest oxygenation level, followed by 2N-OOM<sub>MT</sub> and 2N-OOM<sub>Ali</sub>, which were affected by photochemistry and NO<sub>x</sub> concentrations. These results highlight the significant formation of 2N-OOMs and the influencing factors, on their formation in polluted urban environment, where various VOC precursors and atmospheric oxidants present.

## 1. Introduction

Secondary organic aerosol (SOA) accounts for a significant fraction of particulate matters (Donahue et al., 2009; Ehn et al., 2014; Hallquist et al., 2009; Jimenez et al., 2009). Volatile organic compounds (VOCs) and their oxidation products, *i.e.*, OVOCs, are important precursors of SOA in the atmosphere (Atkinson and Arey, 2003; Bianchi et al., 2019; Ehn et al., 2014; Nie et al., 2022). The N-containing oxygenated organic molecules (OOMs) have been identified as the important products upon VOC oxidation. Especially at high NO<sub>x</sub> levels, these products become more dominant while the others (*i.e.*, alcohols, hydroperoxides and RO<sub>2</sub> cross-reaction products) are likely suppressed (Bianchi et al., 2019; Zhao et al., 2018). The nitrogen atoms in OOM molecules are assumed to be mainly associated with nitrate group (-ONO<sub>2</sub>) formed from bi-molecular reaction between RO<sub>2</sub> radical and NO. Field measurements also observed that up to 77 % of molecules in organic aerosol (OA) contain nitrate functional groups under different [atmospheric conditions](#) (Ditto et al., 2020; Kenagy et al., 2021; Kiendler-Scharr et al., 2016; Lee et al., 2016; Lee Ng et al., 2017; Lin et al., 2021; Rollins et al., 2013; Xu et al., 2015; Ye et al., 2021; Yu et al., 2019).

The N-containing OOM molecules can be classified into 1N-OOMs, 2N-OOMs, and 3N-OOMs, according to the number of [N atoms](#) in the molecule. The chemical composition of N-containing OOMs is determined by their precursors, formation pathways and NO<sub>x</sub> level in the atmosphere (Bianchi et al., 2019; Ehn et al., 2014; Nie et al., 2022; Pye et al., 2019; Riva, 2016; Yan et al., 2016). Recent observations in megacities of China indicated that 2N-OOMs accounted for significant fractions (about 30-33%) among total N-containing OOMs besides 1N-OOMs (66-70%) due to the high NO<sub>x</sub> concentrations in polluted urban environment (Nie et al., 2022; Yan et al., 2021). Some laboratory studies also proposed that the potential formation pathways of 2N-OOMs, such as the multiple-step OH oxidation (Garmash et al., 2020) or the NO<sub>3</sub>-initiated oxidation followed by NO termination (Kiendler-Scharr et al., 2016; Liebmann et al., 2019), suggesting the increased importance of multi-step bimolecular oxidation in the formation of 2N-OOMs. On the other hand, it was also found that the formation of 2N-OOMs showed the clear preference of specific precursors compared to 1N-OOMs, *i.e.*, significantly higher branch ratio of 2N-OOMs from

aliphatic hydrocarbons than those from aromatics (Nie et al., 2022), suggesting considerable difference from 1N-OOMs in terms of formation pathway. Determining the formation pathway of N-containing OOM molecules, especially those containing two to three nitrogen atoms, in real atmosphere, is challenging. Identification of their chemical compositions in molecular level is the key for advancing our understanding in the precursor, formation and sources of N-containing OOMs in polluted atmosphere, where thousands of oxidation products exist and evolve constantly.

Traditionally, a chemical ionization atmospheric pressure interface time-of-flight mass spectrometer (CI-API-TOF) has been used to measure the gaseous OOMs (Berndt et al., 2016; Ehn et al., 2014; Jokinen et al., 2014; Rissanen et al., 2014). Using a CI-API-TOF, increasing number of studies have been reporting the formation of OOMs through the oxidation of various VOC precursors in chamber or flow tube (Berndt et al., 2016, 2018; Ehn et al., 2014; Garmash et al., 2020; Jokinen et al., 2014, 2015; Rissanen et al., 2014; Wang et al., 2020; Zhao et al., 2018). While 2N-OOMs in real ambient almost exclusively located in high  $m/z$  (mass-to-charge) range (*i.e.*, 300 - 500 Th), a CI-API-TOF with highest mass resolving power of 12,000 ( $m/\Delta m$ , in full width at half maximum) at  $m/z=200$  Th and above, can hardly identify the molecular compositions of 2N-OOMs unambiguously. This is because low mass resolving power imposes significant uncertainties on separating overlapping peaks, which increases rapidly with increasing  $m/z$  and decreasing mass resolving power. Taken the integer  $m/z$  of 342 as an example, multiple peaks overlap at this nominal mass, *i.e.*,  $C_7H_8O_{10}N_2(NO_3)^-$  (342.0057 Th),  $C_8H_{12}O_9N_2(NO_3)^-$  (342.0421 Th),  $C_9H_{16}O_8N_2(NO_3)^-$  (342.0785 Th),  $C_{10}H_{20}O_7N_2(NO_3)^-$  (342.1149 Th). The adjacent peaks are of mass differences ( $\Delta m$ ) of 0.0364 and a good peak separation of these peaks ( $4\sigma$ ) requires mass resolving power of at least 16,000. Therefore, development and application of mass spectrometry techniques with extremely high performance in detection limit, time resolution, and mass resolving power, are highly desirable.

To achieve accurate identification of molecular formula from the extremely complex mass spectra, a CI (nitrate) inlet had also been coupled to an orbitrap mass spectrometer (CI-Orbitrap) to measure the OOMs in ultra-high mass resolving power ( $m/\Delta m > 100,000$  at  $m/z=200-500$  Th) (Riva et al., 2019a; Zhang et al., 2022). The ultra-high mass resolving power of CI-Orbitrap will undoubtedly provide

significant improvements in molecular identification, separation, and quantification. Herein, we applied a CI-Orbitrap in a field campaign for the measurements of OOMs, with a special focus on 2N-OOMs, in molecular level in urban Shanghai. The site represents a typical eastern Chinese megacity characterized by intense human activities, multiple anthropogenic emissions and high NO<sub>x</sub> concentrations. Based on the measurement results as well as our current knowledge on N-containing OOM formation, we classify the observed 2N-OOMs into different precursor groups and explore the potential influencing factors on their formation. Furthermore, supported by positive matrix factorization (PMF), sources and gas-phase oxidation processes for 2N-OOM formation in urban Shanghai were identified.

## 2. Ambient measurement and methodology

### 2.1 Measurements

The field campaign was carried out from 31<sup>th</sup> October to 18<sup>th</sup> November, 2020 on the top-floor of an 8-story building in Shanghai Academy of Environmental Sciences (31° 18' N, 121° 43' E, [Figure S1](#)), which sits in a densely populated region surrounded by commercial properties and residential dwellings without significant industrial sources nearby. The site can represent a typical urban area of Shanghai affected by severe local emissions from vehicular traffic, commercial, and residential activities. Our campaign was carried out in autumn which represents a typical transition period from strong photochemistry in summer to intense regional transport in winter. At times, air masses transported from the neighboring provinces or even further from the northern China can also affect the air quality of the site.

The 2N-OOMs as well other OOMs molecules were measured in real time with a nitrate-Orbitrap. The operation of nitrate-Orbitrap has been detailed in previous studies as well as in one of our companion studies (Zhang et al., 2022), thus is only briefly described here. Ambient air was drawn into the ionization source through a 1m stainless-steel tube (3/4 inch). The reagent ion was produced by passing nitric acid in sheath flow (20L/min) into a PhotoIonizer (Model L9491, Hamamatsu, Japan) and was then introduced into a co-axial laminar flow reactor, in which the reagent ions interact with the air samples. The charged species were detected by an orbitrap mass analyzer with a [mass resolving power](#) of about 140,000. Mass-dependent transmission calibrations was also performed using a depletion method (Heinritzi et al., 2016).

Other ancillary measurements, including the PM<sub>2.5</sub> concentrations, trace gases (SO<sub>2</sub>, O<sub>3</sub> and NO<sub>x</sub>), volatile organic compounds, as well as meteorological parameters (wind direction and speed, solar radiation, etc.) were detailed in Supporting Information (SI-1). An overview of the measurement data, illustrating the air quality as well as the meteorological conditions during the campaign, is provided in SI-2 and Figure S2.

## 2.2 Data analysis of nitrate CI-Orbitrap

The raw mass spectra were first extracted by Orbitool (Cai et al., 2020) and the molecular information was then achieved by applying a homemade toolkit based on the MATLAB software. The toolkit drew on the idea from “tofTools” package which is used for analyzing the mass spectral data obtained from the TOF analyzer, such as nitrate CI-API-TOF (Junninen et al., 2010). The concentrations of the detected species are then determined as follows:

$$[X] = \frac{i[X^-]}{NO_3^- \cdot (HNO_3)_{0-2}} \cdot C \quad (1)$$

where  $i[X^-]$  is the transmission-corrected signal intensity of ion X in unit of counts per second (cps),  $C$  represents the calibration factor.  $C$  is determined from the collision frequency of target species with the nitrate ions (cluster) during its residence in the charger, taking into account of the losses onto the walls of the reactor and the tube (Eq. 2):

$$C = C_{H_2SO_4} = \frac{1}{k_{ion} \times RT \times f_{inlet}} \quad (2)$$

where  $k_{ions}$  is the ion collision frequency in the range of  $(1.7 - 2.3) \times 10^{-9} \text{ cm}^3 \text{ s}^{-1}$  (Ehn et al., 2014);  $RT$  is the residence time in the charger and  $f_{inlet}$  represents the fractions of target species that passed through the inlet.

Herein, we apply the  $C$  determined for sulfuric acid (H<sub>2</sub>SO<sub>4</sub>) of  $3.4 \times 10^9 \text{ molecules cm}^{-3} \text{ ncps}^{-1}$  to semi-quantify the concentrations of OOMs, which is widely used in previous studies (Ehn et al., 2014; Yan et al., 2021; Yao et al., 2018). Among the low volatility vapors, it had been demonstrated that nitrate ions exhibit highest charging efficiency toward H<sub>2</sub>SO<sub>4</sub> (Ehn et al., 2014; Hyttinen et al., 2015, 2018; Riva et al., 2019b). The estimated concentrations of OOMs thus can be considered as the lower limits with an uncertainty of  $\pm 50\%$  according to error propagation (Ehn et al., 2014). Positive matrix factorization (PMF) was also performed for the measured species using Source Finder (SoFi, v6.3) based on Igor and run by

the multilinear engine (ME-2) as detailed in SI-S3 and Figure S3-S6 (Canonaco et al., 2013).

### 3. Results and discussion

#### 3.1 Chemical characteristic of OOMs

In total, we have identified 562 OOMs, which concentrated in the nC range of 5 to 10, taking up 84.6% of total OOMs during the whole campaign (unless otherwise stated, all the reported values hereafter were corresponding to the average of the whole campaign). Possible precursors of C<sub>5-10</sub> OOMs include isoprene (C<sub>5</sub>), benzene/alkyl benzenes (C<sub>6-10</sub>), aliphatic VOCs (C<sub>5-10</sub>) and monoterpene (C<sub>10</sub>) according to previous studies (Bianchi et al., 2019; Nie et al., 2022). C<sub>≤4</sub> OOMs only took up a small fraction of 6.7% among total OOMs and were likely a result of the decomposition from OOMs with large carbon numbers as suggested by one of our companion studies (Zhang et al., 2022). The rest 8.7% were C<sub>>10</sub> OOMs which accounted for a dominating fraction (70%, Figure S7) among the extremely low-volatility organic compounds (ELVOC, C\* < 3 × 10<sup>-5</sup> μg m<sup>-3</sup>) based on a volatility parameterization proposed by Donahue and co-workers (Donahue et al., 2011, 2012; Schervish and Donahue, 2020), and potentially poses larger impacts on SOA formation owing to their lower volatility.

We further classified the detected OOMs into four groups based on the number of N atoms they possessed, including non-nitrogen (0N-) OOMs, 1N-OOMs, 2N-OOMs, and 3N-OOMs. Their average fractional contributions to total OOM concentrations as well as the carbon number (nC) distributions are shown in Figure 1. We found 1N-OOMs dominated the total OOM concentration with an average fraction of 50%, followed by 2N-OOMs (26%), demonstrating the dominance of N-containing OOMs among total OOMs. The 3N-OOMs only took up a small fraction (4%) of total OOMs and the rest 20% was 0N-OOMs.

More interestingly, we found 1N-OOMs prevailed among the OOMs with nC ≤ 10, yet 2N-OOMs dominated the C<sub>>10</sub> OOMs (41.8-84.2%), suggesting the increased importance of multi-step bimolecular oxidation in the formation of 2N-OOMs with nC > 10. We also note that the fraction of 2N-OOMs increased stepwise with the increase of nC (Figure 1b) while 3N-OOMs don't exhibit a similar dependence. The potential reason is that, with the increase of nC, on the one hand, more active sites are potentially provided to promote the occurrence of multi-step oxidation, but on the other hand, the potential larger steric effect

can hinder multi-step oxidation. From our observation, these two factors lead an overall positive coupling for 2N-OOMs, but result in a non-monotonic trend for 3N-OOMs. Furthermore, these 2N-OOMs with  $nC > 10$  had an average molecular composition of  $C_{12.5}H_{22.7}O_{2.1}(NO_3)_2$ . Assuming the nitrogen atoms are only associated with nitrate group ( $-ONO_2$ ), the mean double bond equivalent value (DBE) (Nie et al., 2022; Xu et al., 2021) was 1.15 on the carbon skeleton, suggesting its origination from aliphatic compounds, such as alkanes, alkenes, etc. (Gong et al., 2005; Mentel et al., 2015; Wang and Hildebrandt Ruiz, 2018).

We thus further classified the 2N-OOMs to their possible VOC precursors following a recently developed workflow proposed by Nie and co-workers, which is based on the up-to-date understanding of VOC oxidation and molecular characters (*i.e.*, number of different elements, DBE) as well as PMF results (Nie et al., 2022), *i.e.*, aromatics ( $2N-OOM_{Aro}$ ), aliphatics ( $2N-OOM_{Ali}$ ), and monoterpene ( $2N-OOM_{MT}$ ). Note that we group isoprene 2N-OOMs ( $2N-OOM_{Iso}$ ) into  $2N-OOM_{Ali}$  as well because of the low concentration of isoprene in cold season. As a result, the average fractions of  $2N-OOM_{Aro}$ ,  $2N-OOM_{Ali}$  and  $2N-OOM_{MT}$  among total 2N-OOMs were 16.0%, 64.2% and 15.3%, respectively (Figure 2), suggesting significant contribution of aliphatic compounds to 2N-OOMs formation. Taken together, the increased fraction of 2N-OOMs with the increase of  $nC$  and the dominant fraction of  $2N-OOM_{Ali}$  highlight the significant contribution of high-molecular-weight aliphatic precursors (*i.e.*, intermediate volatility or semi-volatile organic compounds, I/SVOCs) to high-molecular-weight 2N-OOM formation, which were potentially important SOA material. We thus focus our attention on the formation of 2N-OOMs in the following sections.

### 3.2 2N-OOM formation in PM episodes

To investigate the formation mechanisms and factors that may affect the 2N-OOM formation, one clean day (4<sup>th</sup>-5<sup>th</sup> November) and one polluted day (7<sup>th</sup>-8<sup>th</sup> November) based on the pollution levels, *i.e.*,  $PM_{2.5}$  concentrations, were selected for further analysis. Since OOM formation is directly mediated by photochemistry or nighttime chemistry, the clean and polluted cases were thus split into one clean daytime case ( $CL_{day}$ ), one clean nighttime case ( $CL_{night}$ ), one polluted daytime case ( $PL_{day}$ ) and one polluted



nighttime case (PL<sub>night</sub>). Detailed information on durations, pollution levels, meteorological conditions and 2N-OOM concentrations during these four cases were summarized in Table 1.

During the whole campaign, the concentrations of 2N-OOMs ranged from  $1.1 \times 10^6$  to  $42.0 \times 10^6$  molecule cm<sup>-3</sup> as shown in Figure 2. We found the concentrations of 2N-OOMs in the polluted cases were 1.7-2.7 times higher than those in clean cases. Table 1 further indicates that the absolute abundances of almost 2N-OOM classes were higher during the polluted cases as compared to clean case no matter in the daytime or nighttime except for the daytime 2N-OOM<sub>Aro</sub>. Specifically, 2N-OOM<sub>Ali</sub> occupied the largest fractions, which were even higher in polluted cases (66-66%) than those in clean cases (56-61%, Figure 2). Especially for the 2N-OOM<sub>Ali</sub> with nC>10, its concentration in polluted cases increased by a factor of 2.3-4.8 compared to the clean cases (Figure 3). From PMF analysis, we also identified a factor characterized by a series of 2N-OOM<sub>Ali</sub> (*i.e.*, C<sub>n</sub>H<sub>2n-2</sub>O<sub>8</sub>N<sub>2</sub>, n=5-11) as the fingerprint molecules (Table S1). This factor tracks the PM<sub>2.5</sub> concentration well especially during PM episodes (Figure S8), likely due to the availability of adequate aliphatic precursors during pollution episode. Furthermore, 2N-OOM<sub>Ali</sub> with nC>10 presented both higher concentrations and fractions during daytime than nighttime cases (Figure 3), suggesting that the photochemical formation of 2N-OOM<sub>Ali</sub> prevailed compared to nighttime formation. To compare CL<sub>night</sub> and PL<sub>night</sub>, it was also found that the pollution case would lead enhanced importance of nighttime formation pathways of 2N-OOM<sub>Ali</sub> with nC>10.

We note that the fraction of 2N-OOM<sub>Ali</sub> increased during CL<sub>night</sub> primarily due to the more evident decrease of 2N-OOM<sub>Aro</sub> (Table 1), whose formation is dominated by photochemistry. On the other hand, the decrease of 2N-OOM<sub>Aro</sub> concentrations at PL<sub>night</sub> was not as obvious as those on CL<sub>night</sub>. Due to the significant increase of 2N-OOM<sub>Ali</sub> concentration, the fraction of 2N-OOM<sub>Aro</sub> decreased in pollution cases, but their absolute concentrations only had few changes in the daytime. 2N-OOM<sub>MT</sub> showed significant higher concentrations but similar fractions in polluted cases. On the other hand, equivalent or even slightly higher concentrations during nighttime than those in daytime suggest the comparable importance of nighttime chemistry in 2N-OOM<sub>MT</sub> formation in contrast to 2N-OOM<sub>Ali</sub> and 2N-OOM<sub>Aro</sub>, which will be discussed in later sections.

To summarize, the absolute concentrations of 2N-OOM were greatly affected by the pollution level for the most cases. Both the concentrations and fractions of 2N-OOM<sub>Ali</sub> were significantly promoted by pollution condition, whereas the 2N-OOM<sub>Aro</sub> were predominantly affected by photochemical production, whose formation was less sensitive to pollution levels compared to 2N-OOM<sub>Ali</sub> in the daytime. In contrast, the absolute concentrations of 2N-OOM<sub>MT</sub> were also significantly influenced by pollution levels but seem not solely/almost depend on daytime/nighttime formation pathway. In addition, we note that both daytime photochemistry and nighttime chemistry had profound effects on 2N-OOMs formation under different pollution levels, presumably depending on availability of the precursors as well as the oxidants. We thus focus our attention on the formation of 2N-OOMs during daytime versus nighttime in the following sections.

### 3.3 Daytime vs. nighttime formation of 2N-OOMs

We thus investigate the effects of photochemistry and nighttime chemistry on the formation of individual 2N-OOMs. While the former is dominated by OH radical oxidation, the latter involves NO<sub>3</sub> radical oxidation as well as reactions with ozone or other oxidants, *e.g.*, halogen. Herein, we use solar radiation as a proxy of photochemical reactivity, and the concentrations of NO<sub>3</sub> radical were estimated assuming that NO<sub>3</sub>, NO<sub>2</sub> and N<sub>2</sub>O<sub>5</sub> were under fast equilibration in troposphere (Brown and Stutz, 2012). The correlation coefficients (Spearman type) between individual 2N-OOM molecules and solar radiation ( $R_{2N-OOMs-solar}$ ) or NO<sub>3</sub> radical ( $R_{2N-OOMs-NO_3}$ ) derived from different precursors during the whole campaign were shown in Figure 4a. It should be noted that the concentrations of 2N-OOMs and NO<sub>3</sub> radicals were scaled with the boundary layer height before calculating the correlation coefficients here and below for correcting the effects of meteorological dilution.

Both 2N-OOM<sub>Aro</sub> and 2N-OOM<sub>Ali</sub> showed stronger correlations with solar radiation over NO<sub>3</sub> radicals, indicating their association with daytime photochemistry since benzene/alkyl benzenes and aliphatic VOCs rapidly react with OH radicals compared to other oxidants, such as NO<sub>3</sub> radicals. This is also supported by the observation that both 2N-OOM<sub>Aro</sub> and 2N-OOM<sub>Ali</sub> peaked during noontime (12:00-14:00) as shown in Figure 4b. Similarly, the PMF analysis also distinguished two daytime factors. The

daytime factor-1 peaked at around 12:00-14:00 (Table S1) and highly correlated with solar radiation ( $R=0.57$ ). The fingerprint-molecules of daytime factor-1 are  $C_nH_{2n-4}O_{10}N_2$  ( $n=8-10$ ) with average DBE values of 2 on the carbon skeleton, suggesting the dominance of 2N-OOMs likely formed from aromatic precursors. Since each step of OH oxidation of aromatics followed by  $RO_2+NO_x$  termination would increase the nH by one, this factor is likely dominated by 2N-OOMs formed from two steps of OH-initiated oxidation from alkylbenzenes given the carbon numbers ranged from 8 to 10.

The key fingerprint molecule of daytime factor-2 is  $C_nH_{2n}O_8N_2$  ( $n=4-5$ ) (accounting for 30.8% in the factor profile), followed by  $C_nH_{2n-2}O_8N_2$  ( $n=5-6$ ) (accounting for 9.7% in the factor profile), which is likely a result of the decomposition from 2N-OOM<sub>Ali</sub> with large carbon numbers, according to their DBE values of 0-1 on the carbon skeleton. This aliphatic factor presented even higher correlation with solar radiation ( $R=0.65$ ), peaking at around 12:00-14:00. Strong daytime peaks together with the good correlations with irradiation suggest the dominance of photochemical oxidation in the formation of 2N-OOM<sub>Ali</sub>. For 2N-OOM<sub>Ali</sub>, although it showed strong daytime peak, weak nighttime peak was still observed. This indicates that although daytime formation of 2N-OOM<sub>Ali</sub> prevails, their nighttime formation still existed. For example, we have obtained a nighttime factor from PMF analysis (nighttime factor-2), whose fingerprint molecules are  $C_5H_8O_9N_2$  and  $C_nH_{2n}O_7N_2$  ( $n=5-8$ ).  $C_5H_8O_9N_2$  was likely originated from isoprene and  $C_nH_{2n}O_7N_2$  were likely from anthropogenic aliphatic precursors.

Nighttime chemistry plays a more important role in the formation of 2N-OOM<sub>MT</sub>. This is further supported by the slightly stronger correlation between 2N-OOM<sub>MT</sub> and  $NO_3$  radicals than solar radiation. For some specific 2N-OOM<sub>MT</sub> species, the formation is likely a result of  $NO_3$  radical initiated oxidation. As shown in Figure 5, we have identified a series of 2N-OOM<sub>MT</sub> molecules with molecular composition of  $C_{10}H_{16}O_{7,9,11}N_2$ , which showed strong positive correlations with  $NO_3$  radical. The occurrence of propagation reaction from  $RO_2$  to RO was critical to the formation of odd oxygen as proposed in previous chamber studies (Boyd et al., 2015; Clafin and Ziemann, 2018). Furthermore, under the nighttime conditions observed in urban Shanghai (Table 1), it is estimated that monoterpenes primarily react with  $NO_3$ , and the fate of nighttime  $RO_2$ s is dominated by NO, which is clear different from rural

environment where NO levels likely drop to near zero after sunset (Romer et al., 2016) and RO<sub>2</sub>s are likely terminated by NO<sub>3</sub>-RO<sub>2</sub> cross-reactions (Bates et al., 2022). Therefore, formation of C<sub>10</sub>H<sub>16</sub>O<sub>7,9,11</sub>N<sub>2</sub> likely started with the reaction of monoterpene with NO<sub>3</sub> radicals forming a NO<sub>3</sub>-C<sub>10</sub>H<sub>16</sub> alkyl radical, followed by the formation of organic peroxy radical (RO<sub>2</sub>) upon addition of O<sub>2</sub>. The RO<sub>2</sub> is then converted to an alkoxy radical (RO) upon reaction with NO. The autoxidation process would then start and stepwise introduce O<sub>2</sub> into the molecule, forming a series of more oxygenated RO<sub>2</sub> radicals, *i.e.*, NO<sub>3</sub>-C<sub>10</sub>H<sub>16</sub>(O)(OO)<sub>n</sub>. The NO termination reaction of these RO<sub>2</sub> radicals would finally result in ONs with chemical composition of NO<sub>3</sub>-C<sub>10</sub>H<sub>16</sub>(O)(OO)<sub>n</sub>O(NO)O (n=0, 1, 2).

On the other hand, the reaction rate between monoterpenes (*i.e.*, alpha-pinene, beta-pinene and limonene) and NO<sub>3</sub> are about 60,000-140,000 times faster than that between monoterpenes and O<sub>3</sub> at 293K (MCMv3.1), but the averaged nighttime concentrations of O<sub>3</sub> (22.8 ppb) was only about 18,000 times higher than that of NO<sub>3</sub> (1.3 ppt). Therefore, NO<sub>3</sub>-initiated oxidation process posed significant impacts on 2N-OOM<sub>MT</sub> formation during nighttime. The 2N-OOM<sub>MT</sub> resulted from NO<sub>3</sub> oxidation is also resolved as a nighttime factor (nighttime factor-1) from PMF analysis, which tracked the NO<sub>3</sub> concentrations well (Figure S9, *R*=0.46) and peaked at around 19:00-23:00. Fingerprint molecule of nighttime factor-1 was mainly including C<sub>10</sub>H<sub>16</sub>O<sub>9</sub>N<sub>2</sub> and C<sub>10</sub>H<sub>16</sub>O<sub>8</sub>N<sub>2</sub>, which is generated from NO<sub>3</sub>-initiated oxidation followed by NO termination and this process will not change the nH of the parent monoterpene molecule.

### 3.4 Oxygenation level of 2N-OOMs

We then calculated the average effective oxygen number ( $nO_{\text{eff}} = nO - 2nN$ ) of 2N-OOMs, which is used to indicate the oxidation state of carbon by excluding the oxygen atoms bonded with nitrogen atoms. Note that calculation of  $nO_{\text{eff}}$  assumes that the nitrogen atoms are only associated with nitrate group (-ONO<sub>2</sub>), which is reasonable after excluding nitrophenol peaks. The average  $nO_{\text{eff}}$  of 2N-OOMs from different precursors in CL<sub>day</sub>, CL<sub>night</sub>, PL<sub>day</sub> and PL<sub>night</sub> were shown in Figure 6 and summarized in Table S2. 2N-OOM<sub>Aro</sub> had the highest  $nO_{\text{eff}}$  (4.8-5.6), followed by 2N-OOM<sub>MT</sub> (4.5-4.9) and 2N-OOM<sub>Ali</sub> were of lowest  $nO_{\text{eff}}$  (3.9-4.0). Difference in the oxygenation level of different types of OOMs can be attributed to the difference in oxidation mechanisms of the initiation reactions. For example, the OH-initiated

oxidation of alkanes, aromatics and monoterpene/alkenes would form a  $C_xH_yO_2$  radical,  $C_xH_yO_5$  radical and  $C_xH_yO_3$  radical, respectively, incorporating different number of oxygen atoms into the original precursor molecules at the first step of oxidation (MCMv3.1). On the other hand, during the multiple-step oxidation in daytime, aromatics could still provide more C=C bonds than other precursors after the initial step which is plausibly capable to further react with OH,  $O_3$  and others oxidants.

Furthermore, we also found that regardless of the pollution level, the  $nO_{eff}$  was considerably higher in daytime cases than that in nighttime cases particularly for 2N-OOM<sub>Aro</sub> and 2N-OOM<sub>MT</sub>, suggesting a profound effects of photochemistry on the formation of highly oxygenated 2N-OOMs. This is likely because of the high  $NO_x$  concentrations during the nighttime (Table 1), which could efficiently suppress the  $RO_2$  radicals from autoxidation reactions forming overall less oxygenated OOM molecules. The effect of  $NO_x$  on oxygenation levels would be discussed in a subsequent paragraph. The average  $nO_{eff}$  of 2N-OOM<sub>Ali</sub> in four sub-periods were similar without significant daytime and nighttime difference, ranging from 3.9-4.0. This could be partly explained by the fact that reactions with oxidants such as OH and halogen radicals will similarly result in the addition of oxygen atoms by two for alkanes during the first step of oxidation. Thus, the oxygenation levels of 2N-OOM<sub>Ali</sub> were supposed to be insensitive to the oxidants in daytime or nighttime.

It is known that NO is also critical in determining the fate of  $RO_2$  radical during the oxidation, forming RO radicals or organonitrates. Formation of RO radicals and organonitrates will have opposite effects on the oxidation state of the termination products since the former will significantly increase the oxygenation state of carbon through initiating propagation reactions before termination. We thus explore the effects of NO as well as the total  $NO_x$  concentrations on the average oxygenation levels of 2N-OOMs from different precursors during the whole campaign (Figure 7). Consistent with previous studies in polluted urban environment (Qiao et al., 2021; Yan et al., 2021), the detected 2N-OOMs were also of low oxygenation with  $nO_{eff}$  of 3.9-5.4 (25-75% percentile) compared to those measured in forest or in laboratory studies (Berndt et al., 2016; Ehn et al., 2014; Jokinen et al., 2014; Rissanen et al., 2014; Yan et al., 2016).  $nO_{eff}$  of 2N-OOM<sub>Aro</sub> and 2N-OOM<sub>MT</sub> increased with the decrease of  $NO/NO_x$  concentrations.

This is likely due to the prevailing of NO termination reactions because the maximum autoxidation rate constant of alkylbenzenes with long-chain substituents (e.g., isopropyl-benzene, ethyl-benzene) and monoterpene are comparable to the bimolecular reaction rate between RO<sub>2</sub> and NO (Bianchi et al., 2019). The oxygenation levels of 2N-OOM<sub>Ali</sub> appears to be insensitive to the pollution levels and NO/NO<sub>x</sub> concentrations, which should be further investigated in future studies.

## 4 Conclusion

We report the unambiguous identification of 2N-OOMs as well as other OOMs using an ultra-high-resolution orbitrap coupled with a nitrate inlet. We found that OOMs distributed in a wide range of carbon numbers (nC = 4 - 16), among which the 2N-OOMs occupied a considerable fraction (26%) of the total observed OOMs. During the whole campaign, the 2N-OOM concentrations ranged from  $1.1 \times 10^6$  to  $42.0 \times 10^6$  molecule cm<sup>-3</sup> and concentrated in the nC range of 5 to 10 with high molecular weight (m/z > 350 Th), suggesting their low volatilities and thus potentially high contribution to local SOA formation.

Aliphatic, aromatics, and monoterpenes were plausible precursors of 2N-OOMs with a fraction of 64.2%, 16% and 15.4%, respectively. The absolute concentrations of 2N-OOMs were greatly affected by the pollution level for the most cases. The 2N-OOM<sub>Ali</sub> was found to be the most abundant 2N-OOMs and its fraction even increased in the polluted day with enhanced proportion of ones with nC>10, probably due to the high concentrations of aliphatic precursors accompanied with PM episodes. Significant contribution of long-chain aliphatic compounds (nC > 10) to 2N-OOM formation is also supported by the observation that 2N-OOM fraction increased with the increase of nC and they are of low DBE values, likely through multistep bimolecular oxidation. 2N-OOM<sub>Ali</sub> and 2N-OOM<sub>Aro</sub> mainly peaked in daytime and showed stronger correlations with solar radiation over NO<sub>3</sub> radicals, indicating their association with daytime photochemistry since benzene/alkyl benzenes and aliphatic hydrocarbons rapidly react with OH radicals compared with other oxidants, such as NO<sub>3</sub> radicals. In contrast, 2N-OOM<sub>MT</sub> prevailed both in daytime and nighttime, some specific 2N-OOM<sub>MT</sub> species showed strong positive correlations with NO<sub>3</sub> radical and were likely a result of NO<sub>3</sub> radical initiated oxidation, suggesting the comparable importance of nighttime NO<sub>3</sub> chemistry in 2N-OOM<sub>MT</sub> formation. In terms of oxygenation levels, we found that 2N-

OOM<sub>Aro</sub> had highest averaged nO<sub>eff</sub> followed by 2N-OOM<sub>MT</sub>. Daytime photochemistry and low NO<sub>x</sub> concentrations had profound effects on the formation of more oxygenated 2N-OOMs. 2N-OOM<sub>Ali</sub> had the lowest nO<sub>eff</sub> and had negligible changes under different pollution levels. These results demonstrate the preference of 2N-OOM formation and the influencing factors in a Chinese megacity involving various VOC precursors (biogenic VOCs such as monoterpene and anthropogenic VOCs such as aromatics, aliphatic hydrocarbons) and various atmospheric oxidants (such as OH radical and NO<sub>3</sub> radicals), and highlight the influence of PM episode.

#### **Code/Data availability**

Data presented in this paper are available upon request to the corresponding author.

#### **Author contributions**

CH designed this study. YL, YM, DDH, SL, SJ, and YG conducted the field campaign. YL analyzed data with contributions from CH and all the other co-authors. YL wrote the manuscript with contributions from all the other co-authors.

#### **Competing interests**

The authors declare that they have no conflict of interest.

#### **Acknowledgement**

This study was financially supported by the Funded by the National Key R&D Program of China (2022YFC3700205), and China Postdoctoral Science Foundation (2022T150427).

#### **Reference**

- Atkinson, R. and Arey, J.: Atmospheric Degradation of Volatile Organic Compounds, Chem. Rev., 103(3), 4605–4638, doi:10.1021/cr0206420, 2003.
- Bates, K. H., Burke, G. J. P., Cope, J. D. and Nguyen, T. B.: Secondary organic aerosol and organic nitrogen yields from the nitrate radical (NO<sub>3</sub>) oxidation of alpha-pinene from various RO<sub>2</sub> fates, Atmos. Chem. Phys., 22(2), 1467–1482, doi:10.5194/acp-22-1467-2022, 2022.
- Berndt, T., Richters, S., Jokinen, T., Hyttinen, N., Kurtén, T., Otkjær, R. V., Kjaergaard, H. G., Stratmann, F., Herrmann, H., Sipilä, M., Kulmala, M. and Ehn, M.: Hydroxyl radical-induced formation of

highly oxidized organic compounds, *Nat. Commun.*, 7(13677), doi:10.1038/ncomms13677, 2016.

Berndt, T., Scholz, W., Mentler, B., Fischer, L., Herrmann, H., Kulmala, M. and Hansel, A.: Accretion Product Formation from Self- and Cross-Reactions of RO<sub>2</sub> Radicals in the Atmosphere, *Angew. Chemie - Int. Ed.*, 57(14), 3820–3824, doi:10.1002/anie.201710989, 2018.

Bianchi, F., Kurtén, T., Riva, M., Mohr, C., Rissanen, M. P., Roldin, P., Berndt, T., Crounse, J. D., Wennberg, P. O., Mentel, T. F., Wildt, J., Junninen, H., Jokinen, T., Kulmala, M., Worsnop, D. R., Thornton, J. A., Donahue, N., Kjaergaard, H. G. and Ehn, M.: Highly Oxygenated Molecules (HOM) from Gas-Phase Autoxidation Involving Organic Peroxy Radicals: A Key Contributor to Atmospheric Aerosol, *Chem. Rev.*, 119, 3472–3509, doi:10.1021/acs.chemrev.8b00395, 2019.

Boyd, C. M., Sanchez, J., Xu, L., Eugene, A. J., Nah, T., Tuet, W. Y., Guzman, M. I. and Ng, N. L.: Secondary organic aerosol formation from the  $\beta$ -pinene+NO<sub>3</sub> system: Effect of humidity and peroxy radical fate, *Atmos. Chem. Phys.*, 15(13), 7497–7522, doi:10.5194/acp-15-7497-2015, 2015.

Brown, S. S. and Stutz, J.: Nighttime radical observations and chemistry, *Chem. Soc. Rev.*, 41, 6405–6447, doi:10.1039/c2cs35181a, 2012.

Cai, R., Li, Y., Clément, Y., Li, D., Dubois, C., Fabre, M., Besson, L., Perrier, S., George, C., Ehn, M., Huang, C., Yi, P., Ma, Y. and Riva, M.: Orbitool: A software tool for analyzing online Orbitrap mass spectrometry data, *Atmos. Meas. Tech.*, 14, 2377–2387, doi:10.5194/amt-2020-267, 2020.

Canonaco, F., Crippa, M., Slowik, J. G., Baltensperger, U. and Prévôt, A. S. H. H.: SoFi, an IGOR-based interface for the efficient use of the generalized multilinear engine (ME-2) for the source apportionment: ME-2 application to aerosol mass spectrometer data, *Atmos. Meas. Tech.*, 6(12), 3649–3661, doi:10.5194/amt-6-3649-2013, 2013.

Claflin, M. S. and Ziemann, P. J.: Identification and Quantitation of Aerosol Products of the Reaction of  $\beta$ -Pinene with NO<sub>3</sub> Radicals and Implications for Gas- and Particle-Phase Reaction Mechanisms, *J. Phys. Chem. A*, 122(14), 3640–3652, doi:10.1021/acs.jpca.8b00692, 2018.

Ditto, J. C., Joo, T., Slade, J. H., Shepson, P. B., Ng, N. L. and Gentner, D. R.: Nontargeted Tandem Mass Spectrometry Analysis Reveals Diversity and Variability in Aerosol Functional Groups across



401 Multiple Sites, Seasons, and Times of Day, *Environ. Sci. Technol. Lett.*, 7(2), 60–69,  
 402 doi:10.1021/acs.estlett.9b00702, 2020.

403 Donahue, N. M., Robinson, A. L. and Pandis, S. N.: Atmospheric organic particulate matter: From smoke  
 404 to secondary organic aerosol, *Atmos. Environ.*, 43(1), 94–106, doi:10.1016/j.atmosenv.2008.09.055,  
 405 2009.

406 Donahue, N. M., Epstein, S. A., Pandis, S. N. and Robinson, A. L.: A two-dimensional volatility basis set:  
 407 1. organic-aerosol mixing thermodynamics, *Atmos. Chem. Phys.*, 11(7), 3303–3318,  
 408 doi:10.5194/acp-11-3303-2011, 2011.

409 Donahue, N. M., Kroll, J. H., Pandis, S. N. and Robinson, A. L.: A two-dimensional volatility basis set-  
 410 Part 2: Diagnostics of organic-aerosol evolution, *Atmos. Chem. Phys.*, 12(2), 615–634,  
 411 doi:10.5194/acp-12-615-2012, 2012.

412 Ehn, M., Thornton, J. A., Kleist, E., Sipilä, M., Junninen, H., Pullinen, I., Springer, M., Rubach, F.,  
 413 Tillmann, R., Lee, B., Lopez-Hilfiker, F., Andres, S., Acir, I.-H. H., Rissanen, M., Jokinen, T.,  
 414 Schobesberger, S., Kangasluoma, J., Kontkanen, J., Nieminen, T., Kurtén, T., Nielsen, L. B.,  
 415 Jørgensen, S., Kjaergaard, H. G., Canagaratna, M., Maso, M. D., Berndt, T., Petäjä, T., Wahner, A.,  
 416 Kerminen, V.-M. M., Kulmala, M., Worsnop, D. R., Wildt, J. and Mentel, T. F.: A large source of  
 417 low-volatility secondary organic aerosol, *Nature*, 506(7489), 476–479, doi:10.1038/nature13032,  
 418 2014.

419 Garmash, O., Rissanen, M. P., Pullinen, I., Schmitt, S., Kausiala, O., Tillmann, R., Zhao, D., Percival, C.,  
 420 Bannan, T. J., Priestley, M., Hallquist, A. M., Kleist, E., Kiendler-Scharr, A., Hallquist, M., Berndt,  
 421 T., McFiggans, G., Wildt, J., Mentel, T. F. and Ehn, M.: Multi-generation OH oxidation as a source  
 422 for highly oxygenated organic molecules from aromatics, *Atmos. Chem. Phys.*, 20(1), 515–537,  
 423 doi:10.5194/acp-20-515-2020, 2020.

424 Gong, H., Matsunaga, A. and Ziemann, P. J.: Products and mechanism of secondary organic aerosol  
 425 formation from reactions of linear alkenes with NO<sub>3</sub> Radicals, *J. Phys. Chem. A*, 109(19), 4312–  
 426 4324, doi:10.1021/jp058024l, 2005.

427 Hallquist, M., Wenger, J. C., Baltensperger, U., Rudich, Y., Simpson, D., Claeys, M., Dommen, J.,  
 428 Donahue, N. M., George, C., Goldstein, A. H., Hamilton, J. F., Herrmann, H., Hoffmann, T., Iinuma,  
 429 Y., Jang, M., Jenkin, M. E., Jimenez, J. L., Kiendler-Scharr, A., Maenhaut, W., McFiggans, G.,  
 430 Mentel, T. F., Monod, A., Prévôt, A. S. H., Seinfeld, J. H., Surratt, J. D., Szmigielski, R. and Wildt,  
 431 J.: The formation, properties and impact of secondary organic aerosol: Current and emerging issues,  
 432 *Atmos. Chem. Phys.*, 9(14), 5155–5236, doi:10.5194/acp-9-5155-2009, 2009.

433 Heinritzi, M., Simon, M., Steiner, G., Wagner, A. C., K<sup>??</sup>rten, A., Hansel, A. and Curtius, J.:  
 434 Characterization of the mass-dependent transmission efficiency of a CIMS, *Atmos. Meas. Tech.*, 9(4),  
 435 1449–1460, doi:10.5194/amt-9-1449-2016, 2016.

436 Hyttinen, N., Kupiainen-Määttä, O., Rissanen, M. P., Muuronen, M., Ehn, M. and Kurtén, T.: Modeling  
 437 the Charging of Highly Oxidized Cyclohexene Ozonolysis Products Using Nitrate-Based Chemical  
 438 Ionization, *J. Phys. Chem. A*, 119(24), 6339–6345, doi:10.1021/acs.jpca.5b01818, 2015.

439 Hyttinen, N., Otkjær, R. V., Iyer, S., Kjaergaard, H. G., Rissanen, M. P., Wennberg, P. O. and Kurtén, T.:  
 440 Computational Comparison of Different Reagent Ions in the Chemical Ionization of Oxidized  
 441 Multifunctional Compounds, *J. Phys. Chem. A*, 122(1), 269–279, doi:10.1021/acs.jpca.7b10015,  
 442 2018.

443 Jimenez, J. L., Canagaratna, M. R., Donahue, N. M., Prevot, A. S. H. H., Zhang, Q., Kroll, J. H., DeCarlo,  
 444 P. F., Allan, J. D., Coe, H., Ng, N. L., Aiken, A. C., Docherty, K. S., Ulbrich, I. M., Grieshop, A. P.,  
 445 Robinson, A. L., Duplissy, J., Smith, J. D., Wilson, K. R., Lanz, V. A., Hueglin, C., Sun, Y. L., Tian,  
 446 J., Laaksonen, A., Raatikainen, T., Rautiainen, J., Vaattovaara, P., Ehn, M., Kulmala, M., Tomlinson,  
 447 J. M., Collins, D. R., Cubison, M. J., Dunlea, J., Huffman, J. A., Onasch, T. B., Alfarra, M. R.,  
 448 Williams, P. I., Bower, K., Kondo, Y., Schneider, J., Drewnick, F., Borrmann, S., Weimer, S.,  
 449 Demerjian, K., Salcedo, D., Cottrell, L., Griffin, R., Takami, A., Miyoshi, T., Hatakeyama, S.,  
 450 Shimono, A., Sun, J. Y., Zhang, Y. M., Dzepina, K., Kimmel, J. R., Sueper, D., Jayne, J. T., Herndon,  
 451 S. C., Trimborn, A. M., Williams, L. R., Wood, E. C., Middlebrook, A. M., Kolb, C. E., Baltensperger,  
 452 U., Worsnop, D. R., Dunlea, E. J., Huffman, J. A., Onasch, T. B., Alfarra, M. R., Williams, P. I.,

453 Bower, K., Kondo, Y., Schneider, J., Drewnick, F., Borrmann, S., Weimer, S., Demerjian, K.,  
 454 Salcedo, D., Cottrell, L., Griffin, R., Takami, A., Miyoshi, T., Hatakeyama, S., Shimono, A., Sun, J.  
 455 Y., Zhang, Y. M., Dzepina, K., Kimmel, J. R., Sueper, D., Jayne, J. T., Herndon, S. C., Trimborn, A.  
 456 M., Williams, L. R., Wood, E. C., Middlebrook, A. M., Kolb, C. E., Baltensperger, U. and Worsnop,  
 457 D. R.: Evolution of Organic Aerosols in the Atmosphere, *Science* (80-. ), 326(5959), 1525–1529,  
 458 doi:10.1126/science.1180353, 2009.

459 Jokinen, T., Sipilä, M., Richters, S., Kerminen, V. M., Paasonen, P., Stratmann, F., Worsnop, D., Kulmala,  
 460 M., Ehn, M., Herrmann, H. and Berndt, T.: Rapid autoxidation forms highly oxidized RO<sub>2</sub> radicals  
 461 in the atmosphere, *Angew. Chemie Int. Ed.*, 53, 14596–14600, doi:10.1002/anie.201408566, 2014.

462 Jokinen, T., Berndt, T., Makkonen, R., Kerminen, V.-M., Junninen, H., Paasonen, P., Stratmann, F.,  
 463 Herrmann, H., Guenther, A. B., Worsnop, D. R., Kulmala, M., Ehn, M. and Sipilä, M.: Production  
 464 of extremely low volatile organic compounds from biogenic emissions: Measured yields and  
 465 atmospheric implications, *Proc. Natl. Acad. Sci.*, 112(23), 7123–7128,  
 466 doi:10.1073/pnas.1423977112, 2015.

467 Junninen, H., Ehn, M., Petäjä, Luosujärvi, L., Kotiaho, T., Kostianinen, R., Rohner, U., Gonin, M., Fuhrer,  
 468 K., Kulmala, M. and Worsnop, D. R.: A high-resolution mass spectrometer to measure atmospheric  
 469 ion composition, *Atmos. Meas. Tech.*, 3(4), 1039–1053, doi:10.5194/amt-3-1039-2010, 2010.

470 Kenagy, H. S., Present, P. S. R., Wooldridge, P. J., Nault, B. A., Campuzano-jost, P., Day, D. A., Jimenez,  
 471 J. L., Zare, A., Pye, H. O. T., Yu, J., Song, C. H., Blake, D. R., Woo, J., Kim, Y. and Cohen, R. C.:  
 472 Contribution of Organic Nitrates to Organic Aerosol over South Korea during KORUS-AQ, *Environ.*  
 473 *Sci. Technol.*, 55, 16326–16338, doi:10.1021/acs.est.1c05521, 2021.

474 Kiendler-Scharr, A., Mensah, A. A., Friese, E., Topping, D., Nemitz, E., Prevot, A. S. H., Äijälä, M.,  
 475 Allan, J., Canonaco, F., Canagaratna, M., Carbone, S., Crippa, M., Dall'Osto, M., Day, D. A., De  
 476 Carlo, P., Di Marco, C. F., Elbern, H., Eriksson, A., Freney, E., Hao, L., Herrmann, H., Hildebrandt,  
 477 L., Hillamo, R., Jimenez, J. L., Laaksonen, A., McFiggans, G., Mohr, C., O'Dowd, C., Otjes, R.,  
 478 Ovadnevaite, J., Pandis, S. N., Poulain, L., Schlag, P., Sellegri, K., Swietlicki, E., Tiitta, P.,

479 Vermeulen, A., Wahner, A., Worsnop, D. and Wu, H. C.: Ubiquity of organic nitrates from nighttime  
 480 chemistry in the European submicron aerosol, *Geophys. Res. Lett.*, 43(14), 7735–7744,  
 481 doi:10.1002/2016GL069239, 2016.

482 Lee, B. H., Mohr, C., Lopez-Hilfiker, F. D., Lutz, A., Hallquist, M., Lee, L., Romer, P., Cohen, R. C.,  
 483 Iyer, S., Kurtén, T., Hu, W., Day, D. A., Campuzano-Jost, P., Jimenez, J. L., Xu, L., Ng, N. L., Guo,  
 484 H., Weber, R. J., Wild, R. J., Brown, S. S., Koss, A., De Gouw, J., Olson, K., Goldstein, A. H., Seco,  
 485 R., Kim, S., McAvey, K., Shepson, P. B., Starn, T., Baumann, K., Edgerton, E. S., Liu, J., Shilling,  
 486 J. E., Miller, D. O., Brune, W., Schobesberger, S., D'Ambro, E. L. and Thornton, J. A.: Highly  
 487 functionalized organic nitrates in the southeast United States: Contribution to secondary organic  
 488 aerosol and reactive nitrogen budgets, *Proc. Natl. Acad. Sci. U. S. A.*, 113(6), 1516–1521,  
 489 doi:10.1073/pnas.1508108113, 2016.

490 Lee Ng, N., Brown, S. S., Archibald, A. T., Atlas, E., Cohen, R. C., Crowley, J. N., Day, D. A., Donahue,  
 491 N. M., Fry, J. L., Fuchs, H., Griffin, R. J., Guzman, M. I., Herrmann, H., Hodzic, A., Iinuma, Y.,  
 492 Kiendler-Scharr, A., Lee, B. H., Luecken, D. J., Mao, J., McLaren, R., Mutzel, A., Osthoff, H. D.,  
 493 Ouyang, B., Picquet-Varrault, B., Platt, U., Pye, H. O. T., Rudich, Y., Schwantes, R. H., Shiraiwa,  
 494 M., Stutz, J., Thornton, J. A., Tilgner, A., Williams, B. J. and Zaveri, R. A.: Nitrate radicals and  
 495 biogenic volatile organic compounds: Oxidation, mechanisms, and organic aerosol, *Atmos. Chem.*  
 496 *Phys.*, 17(3), 2103–2162, doi:10.5194/acp-17-2103-2017, 2017.

497 Liebmann, J., Sobanski, N., Schuladen, J., Karu, E., Hellén, H., Hakola, H., Zha, Q., Ehn, M., Riva, M.,  
 498 Williams, J., Fischer, H., Lelieveld, J. and Crowley, J. N.: Alkyl nitrates in the boreal forest:  
 499 Formation via the NO<sub>3</sub>, OH and O<sub>3</sub> induced oxidation of BVOCs and ambient lifetimes, *Atmos.*  
 500 *Chem. Phys. Discuss.*, (3), 1–23, doi:10.5194/acp-2019-463, 2019.

501 Lin, C., Huang, R. J., Duan, J., Zhong, H. and Xu, W.: Primary and Secondary Organic Nitrate in  
 502 Northwest China: A Case Study, *Environ. Sci. Technol. Lett.*, 8(11), 947–953,  
 503 doi:10.1021/acs.estlett.1c00692, 2021.

504 Mentel, T. F., Springer, M., Ehn, M., Kleist, E., Pullinen, I., Kurtén, T., Rissanen, M., Wahner, A. and

Wildt, J.: Formation of highly oxidized multifunctional compounds: autoxidation of peroxy radicals  
 formed in the ozonolysis of alkenes-deduced from structure–product relationships, *Atmos. Chem.*  
*Phys. Discuss.*, 15(2), 2791–2851, doi:10.5194/acpd-15-2791-2015, 2015.

Nie, W., Yan, C., Huang, D. D., Wang, Z., Liu, Y., Qiao, X., Guo, Y., Tian, L., Zheng, P., Xu, Z., Li, Y.,  
 Xu, Z., Qi, X., Sun, P., Wang, J., Zheng, F., Li, X., Yin, R., Dallenbach, K. R., Bianchi, F., Petäjä,  
 T., Zhang, Y., Wang, M., Schervish, M., Wang, S., Qiao, L., Wang, Q., Zhou, M., Wang, H., Yu, C.,  
 Yao, D., Guo, H., Ye, P., Lee, S., Li, Y. J., Liu, Y., Chi, X., Kerminen, V.-M., Ehn, M., Donahue, N.  
 M., Wang, T., Huang, C., Kulmala, M., Worsnop, D., Jiang, J. and Ding, A.: Secondary organic  
 aerosol formed by condensing anthropogenic vapours over China’s megacities, *Nat. Geosci.*, 15,  
 255–261, doi:10.1038/s41561-022-00922-5, 2022.

Pye, H. O. T., D’Ambro, E. L., Lee, B. H., Schobesberger, S., Takeuchi, M., Zhao, Y., Lopez-Hilfiker, F.,  
 Liu, J., Shilling, J. E., Xing, J., Mathur, R., Middlebrook, A. M., Liao, J., Welti, A., Graus, M.,  
 Warneke, C., de Gouw, J. A., Holloway, J. S., Ryerson, T. B., Pollack, I. B. and Thornton, J. A.:  
 Anthropogenic enhancements to production of highly oxygenated molecules from autoxidation, *Proc.*  
*Natl. Acad. Sci. U. S. A.*, 116(14), 6641–6646, doi:10.1073/pnas.1810774116, 2019.

Qiao, X., Yan, C., Li, X., Guo, Y., Yin, R., Deng, C., Li, C., Nie, W., Wang, M., Cai, R., Huang, D., Wang,  
 Z., Yao, L., Worsnop, D. R., Bianchi, F., Liu, Y., Donahue, N. M., Kulmala, M. and Jiang, J.:  
 Contribution of Atmospheric Oxygenated Organic Compounds to Particle Growth in an Urban  
 Environment, *Environ. Sci. Technol.*, doi:10.1021/acs.est.1c02095, 2021.

Rissanen, M. P., Kurtén, T., Sipilä, M., Thornton, J. A., Kangasluoma, J., Sarnela, N., Junninen, H.,  
 Jørgensen, S., Schallhart, S., Kajos, M. K., Taipale, R., Springer, M., Mentel, T. F., Ruuskanen, T.,  
 Petäjä, T., Worsnop, D. R., Kjaergaard, H. G. and Ehn, M.: The formation of highly oxidized  
 multifunctional products in the ozonolysis of cyclohexene, *J. Am. Chem. Soc.*, 136(44), 15596–  
 15606, doi:10.1021/ja507146s, 2014.

Riva, M.: Multiphase Chemistry of Highly Oxidized Molecules: The Case of Organic Hydroperoxides,  
*Chem*, 1(4), 526–528, doi:10.1016/j.chempr.2016.09.015, 2016.

531 Riva, M., Ehn, M., Li, D., Tomaz, S., Bourgain, F., Perrier, S. and George, C.: CI-Orbitrap: An Analytical  
 532 Instrument to Study Atmospheric Reactive Organic Species, *Anal. Chem.*, 91, 9419–9423,  
 533 doi:10.1021/acs.analchem.9b02093, 2019a.

534 Riva, M., Rantala, P., Krechmer, J. E., Peräkylä, O., Zhang, Y., Heikkinen, L., Garmash, O., Yan, C.,  
 535 Kulmala, M., Worsnop, D. and Ehn, M.: Evaluating the performance of five different chemical  
 536 ionization techniques for detecting gaseous oxygenated organic species, *Atmos. Meas. Tech.*, 12,  
 537 2403–2421, doi:10.5194/amt-2018-407, 2019b.

538 Rollins, A. W., Pusede, S., Wooldridge, P., Min, K. E., Gentner, D. R., Goldstein, A. H., Liu, S., Day, D.  
 539 A., Russell, L. M., Rubitschun, C. L., Surratt, J. D. and Cohen, R. C.: Gas/particle partitioning of  
 540 total alkyl nitrates observed with TD-LIF in Bakersfield, *J. Geophys. Res. Atmos.*, 118(12), 6651–  
 541 6662, doi:10.1002/jgrd.50522, 2013.

542 Romer, P. S., Duffey, K. C., Wooldridge, P. J., Allen, H. M., Ayres, B. R., Brown, S. S., Brune, W. H.,  
 543 Crounse, J. D., De Gouw, J., Draper, D. C., Feiner, P. A., Fry, J. L., Goldstein, A. H., Koss, A.,  
 544 Misztal, P. K., Nguyen, T. B., Olson, K., Teng, A. P., Wennberg, P. O., Wild, R. J., Zhang, L. and  
 545 Cohen, R. C.: The lifetime of nitrogen oxides in an isoprene-dominated forest, *Atmos. Chem. Phys.*,  
 546 16(12), 7623–7637, doi:10.5194/acp-16-7623-2016, 2016.

547 Schervish, M. and Donahue, N. M.: Peroxy radical chemistry and the volatility basis set, *Atmos. Chem.*  
 548 *Phys.*, 20(2), 1183–1199, doi:10.5194/acp-20-1183-2020, 2020.

549 Wang, D. S. and Hildebrandt Ruiz, L.: Chlorine-initiated oxidation of n-alkanes under high NO<sub>x</sub>  
 550 conditions: Insights into secondary organic aerosol composition and volatility using a FIGAERO-  
 551 CIMS, *Atmos. Chem. Phys. Discuss.*, (x), 1–26, doi:10.5194/acp-2018-443, 2018.

552 Wang, Y., Mehra, A., Krechmer, J., Yang, G., Hu, X., Lu, Y., Lambe, A., Canagaratna, M., Chen, J.,  
 553 Worsnop, D., Coe, H. and Wang, L.: Oxygenated products formed from OH-initiated reactions of  
 554 trimethylbenzene: Autoxidation and accretion, *Atmos. Chem. Phys.*, 20, 9563–9579,  
 555 doi:10.5194/acp-2020-165, 2020.

556 Xu, L., Suresh, S., Guo, H., Weber, R. J. and Ng, N. L.: Aerosol characterization over the southeastern

557 United States using high-resolution aerosol mass spectrometry: Spatial and seasonal variation of  
 558 aerosol composition and sources with a focus on organic nitrates, *Atmos. Chem. Phys.*, 15(13), 7307–  
 559 7336, doi:10.5194/acp-15-7307-2015, 2015.

560 Xu, Z. N., Nie, W., Liu, Y. L., Sun, P., Huang, D. D., Yan, C., Krechmer, J., Ye, P. L., Xu, Z., Qi, X. M.,  
 561 Zhu, C. J., Li, Y. Y., Wang, T. Y., Wang, L., Huang, X., Tang, R. Z., Guo, S., Xiu, G. L., Fu, Q. Y.,  
 562 Worsnop, D., Chi, X. G. and Ding, A. J.: Multifunctional Products of Isoprene Oxidation in Polluted  
 563 Atmosphere and Their Contribution to SOA, *Geophys. Res. Lett.*, 48(1), 1–10,  
 564 doi:10.1029/2020GL089276, 2021.

565 Yan, C., Nie, W., Äijälä, M., Rissanen, M. P., Canagaratna, M. R., Massoli, P., Junninen, H., Jokinen, T.,  
 566 Sarnela, N., Häme, S. A. K., Schobesberger, S., Canonaco, F., Yao, L., Prévôt, A. S. H., Petäjä, T.,  
 567 Kulmala, M., Sipilä, M., Worsnop, D. R. and Ehn, M.: Source characterization of highly oxidized  
 568 multifunctional compounds in a boreal forest environment using positive matrix factorization, *Atmos.*  
 569 *Chem. Phys.*, 16, 12715–12731, doi:10.5194/acp-16-12715-2016, 2016.

570 Yan, C., Yin, R., Lu, Y., Dada, L., Yang, D., Fu, Y., Kontkanen, J., Deng, C., Garmash, O., Ruan, J.,  
 571 Baalbaki, R., Schervish, M., Cai, R., Bloss, M., Chan, T., Chen, T., Chen, Q., Chen, X., Chen, Y.,  
 572 Chu, B., Dällenbach, K., Foreback, B., He, X., Heikkinen, L., Jokinen, T., Junninen, H.,  
 573 Kangasluoma, J., Kokkonen, T., Kurppa, M., Lehtipalo, K., Li, H., Li, H., Li, X., Liu, Y., Ma, Q.,  
 574 Paasonen, P., Rantala, P., Pileci, R. E., Rusanen, A., Sarnela, N., Simonen, P., Wang, S., Wang, W.,  
 575 Wang, Y., Xue, M., Yang, G., Yao, L., Zhou, Y., Kujansuu, J., Petäjä, T., Nie, W., Ma, Y., Ge, M.,  
 576 He, H., Donahue, N. M., Worsnop, D. R., Veli-Matti Kerminen, Wang, L., Liu, Y., Zheng, J.,  
 577 Kulmala, M., Jiang, J. and Bianchi, F.: The Synergistic Role of Sulfuric Acid, Bases, and Oxidized  
 578 Organics Governing New-Particle Formation in Beijing, *Geophys. Res. Lett.*, 48, 2020GL091944,  
 579 doi:10.1029/2020gl091944, 2021.

580 Yao, L., Garmash, O., Bianchi, F., Zheng, J., Yan, C., Kontkanen, J., Junninen, H., Mazon, S. B., Ehn, M.,  
 581 Paasonen, P., Sipilä, M., Wang, M., Wang, X., Xiao, S., Chen, H., Lu, Y., Zhang, B., Wang, D., Fu,  
 582 Q., Geng, F., Li, L., Wang, H., Qiao, L., Yang, X., Chen, J., Kerminen, V.-M., Petäjä, T., Worsnop,

583 D. R., Kulmala, M. and Wang, L.: Atmospheric new particle formation from sulfuric acid and amines  
 584 in a Chinese megacity, *Science* (80-. ), 361, 278–281, doi:10.1126/science.aao4839, 2018.

585 Ye, C., Yuan, B., Lin, Y., Wang, Z., Hu, W., Li, T., Chen, W., Wu, C., Wang, C., Huang, S., Qi, J., Wang,  
 586 B., Wang, C., Song, W., Wang, X., Zheng, E., Krechmer, J. E., Ye, P., Zhang, Z., Wang, X., Worsnop,  
 587 D. R. and Shao, M.: Chemical characterization of oxygenated organic compounds in the gas phase  
 588 and particle phase using iodide CIMS with FIGAERO in urban air, *Atmos. Chem. Phys.*, 21(11),  
 589 8455–8478, doi:10.5194/acp-21-8455-2021, 2021.

590 Yu, K., Zhu, Q., Du, K. and Huan, X. F.: Characterization of nighttime formation of particulate organic  
 591 nitrates based on high-resolution aerosol mass spectrometry in an urban atmosphere in China, *Atmos.*  
 592 *Chem. Phys.*, 19(7), 5235–5249, doi:10.5194/acp-19-5235-2019, 2019.

593 Zhang, Y., Li, D., Ma, Y., Dubois, C., Wang, X., Perrier, S., Chen, H., Wang, H., Jing, S., Lu, Y., Lou,  
 594 S., Yan, C., Nie, W., Chen, J., Huang, C., George, C. and Riva, M.: Field Detection of Highly  
 595 Oxygenated Organic Molecules in Shanghai by Chemical Ionization–Orbitrap, *Environ. Sci.*  
 596 *Technol.*, doi:10.1021/acs.est.1c08346, 2022.

597 Zhao, Y., Thornton, J. A. and Pye, H. O. T.: Quantitative constraints on autoxidation and dimer formation  
 598 from direct probing of monoterpene-derived peroxy radical chemistry, *Proc. Natl. Acad. Sci. U. S.*  
 599 *A.*, 115(48), 12142–12147, doi:10.1073/pnas.1812147115, 2018.

600



Table 1 Summary of the four cases including the meteorological conditions and concentrations of trace gases and 2N-OOMs

| Case                | Time                                                    | $\overline{PM_{2.5}}$<br>( $\mu\text{g m}^{-3}$ ) | $\overline{Solar}$<br>( $\text{W m}^{-2}$ ) | $\bar{T}$<br>( $^{\circ}\text{C}$ ) | $\overline{RH}$<br>(%) | $\overline{[O_3]}$<br>(ppb) | $\overline{[NO]}$<br>(ppb) | $\overline{[NO_2]}$<br>(ppb) | $\overline{[NO_3]}$<br>(ppt) | $\overline{[2N - OOM_{Aro}]}$<br>( $\times 10^6 \text{ cm}^{-3}$ ) | $\overline{[2N - OOM_{Alt}]}$<br>( $\times 10^6 \text{ cm}^{-3}$ ) | $\overline{[2N - OOM_{MT}]}$<br>( $\times 10^6 \text{ cm}^{-3}$ ) | $\overline{[2N - OOM_{Total}]}$<br>( $\times 10^6 \text{ cm}^{-3}$ ) |
|---------------------|---------------------------------------------------------|---------------------------------------------------|---------------------------------------------|-------------------------------------|------------------------|-----------------------------|----------------------------|------------------------------|------------------------------|--------------------------------------------------------------------|--------------------------------------------------------------------|-------------------------------------------------------------------|----------------------------------------------------------------------|
| CL <sub>day</sub>   | Nov. 4 <sup>th</sup> 12:00 - 14:00                      | 7.5                                               | 635.6                                       | 18.9                                | 35.2                   | 41.9                        | 3.2                        | 8.2                          | 0.1                          | 6.3                                                                | 11.7                                                               | 2.3                                                               | 20.8                                                                 |
| CL <sub>night</sub> | Nov. 4 <sup>th</sup> 23:00 - Nov. 5 <sup>th</sup> 01:00 | 9.5                                               | 2.4                                         | 13.0                                | 64.1                   | 8.0                         | 2.9                        | 40.5                         | 0.2                          | 1.3                                                                | 6.0                                                                | 2.3                                                               | 9.8                                                                  |
| PL <sub>day</sub>   | Nov. 7 <sup>th</sup> 12:00 - 14:00                      | 44.0                                              | 384.5                                       | 23.9                                | 30.5                   | 73.9                        | 2.2                        | 20.6                         | 0.3                          | 6.4                                                                | 23.8                                                               | 4.3                                                               | 36.2                                                                 |
| PL <sub>night</sub> | Nov. 7 <sup>th</sup> 23:00 - Nov. 8 <sup>th</sup> 01:00 | 60.5                                              | 2.5                                         | 17.8                                | 44.9                   | 27.2                        | 2.1                        | 38.7                         | 6.2                          | 3.1                                                                | 17.4                                                               | 5.3                                                               | 26.5                                                                 |

## Figure Captions

**Figure 1.** (a) Average mass spectrum of the detected OOMs during the whole campaign. The pie chart shows the fractions of OOMs with different number of nitrogen and carbon atoms; (b) The fractions of 0N-OOMs, 1N-OOMs, 2N-OOMs and 3N-OOMs among total OOMs as a function of carbon number (nC).

**Figure 2.** The timeseries of 2N-OOMs originated from different precursors. Four sub-periods were selected to further investigate the fractional distribution of different type of OOM molecules as shown in the pie chart, including a clean daytime case (12:00 to 14:00 on November 4<sup>th</sup>,  $PM_{2.5}=7.5 \mu g m^{-3}$ ,  $CL_{day}$ ), a clean nighttime case (23:00 on November 4<sup>th</sup> to 01:00 on November 5<sup>th</sup>,  $PM_{2.5}=9.5 \mu g m^{-3}$ ,  $CL_{night}$ ), a daytime case in a PM episode (12:00 to 14:00 on November 7<sup>th</sup>,  $PM_{2.5}=44.0 \mu g m^{-3}$ ,  $PL_{day}$ ) and a nighttime case in a PM episode (23:00 on November 7<sup>th</sup> to 01:00 on November 8<sup>th</sup>,  $PM_{2.5}=60.5 \mu g m^{-3}$ ,  $PL_{night}$ ). The sizes of pie charts are scaled to the total concentrations of 2N-OOMs.

**Figure 3.** The fractions of 2N-OOM<sub>Ali</sub> with different carbon numbers in the four cases.

**Figure 4.** (a) Statistical distribution of the correlation coefficients (Spearman type) between 2N-OOMs and solar radiation ( $R_{2N-OOMs - solar}$ ) in red and the correlation coefficients between 2N-OOMs and [NO<sub>3</sub>] ( $R_{2N-OOMs - NO3}$ ) in blue for 2N-OOMs from different precursors. The horizontal lines are the median values, boxes denote the 25th- and 75th- percentile values, and whiskers represent the 10th- and 90th- percentile values. (b) The diel patterns of 2N-OOMs from different precursors.

**Figure 5.** Scatter plot of  $R_{2N-OOMs - NO3}$  against  $R_{2N-OOMs - solar}$  for specific 2N-OOM species.

**Figure 6.** The  $nO_{eff}$  of 2N-OOMs derived from different precursors in the four cases, the error bars represent the standard deviations.

**Figure 7.** Effective oxygen number ( $nO_{eff}$ ) of 2N-OOMs as a function of (a) NO concentration and (b) NO<sub>x</sub> concentration. The colored squares represent the real measurements. The filled markers indicate the median values in the range as horizontal error bars show, the vertical error bars denote the 25th- and 75th-percentile values.

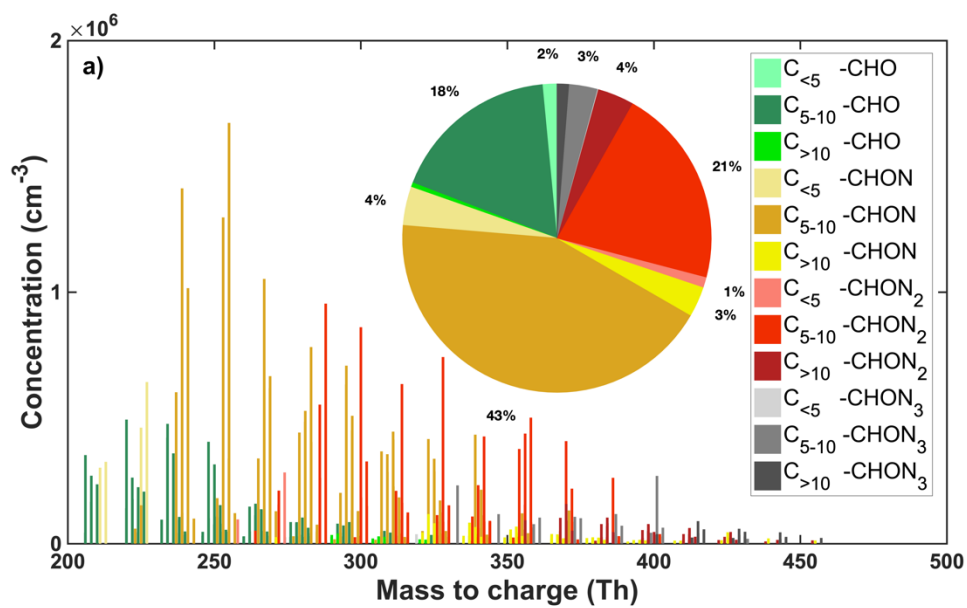

Figure 1a

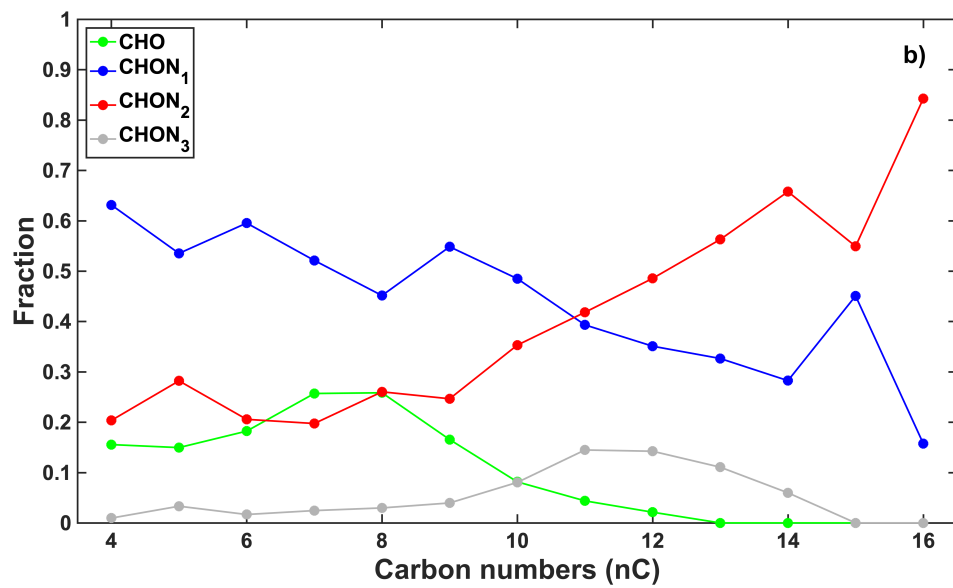

Figure 1b

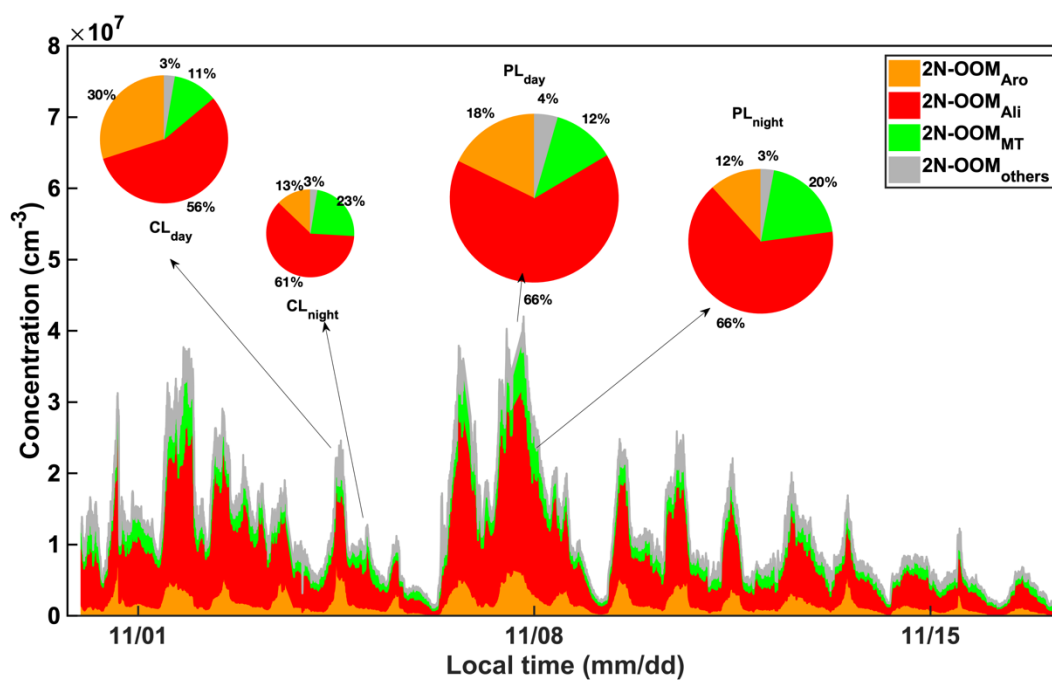

Figure 2

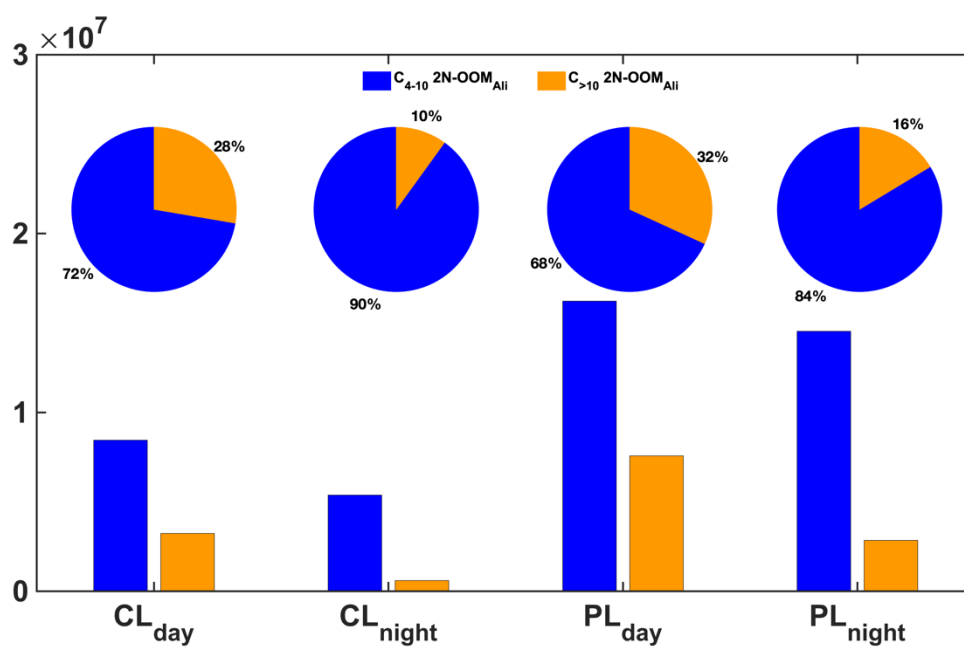

Figure 3

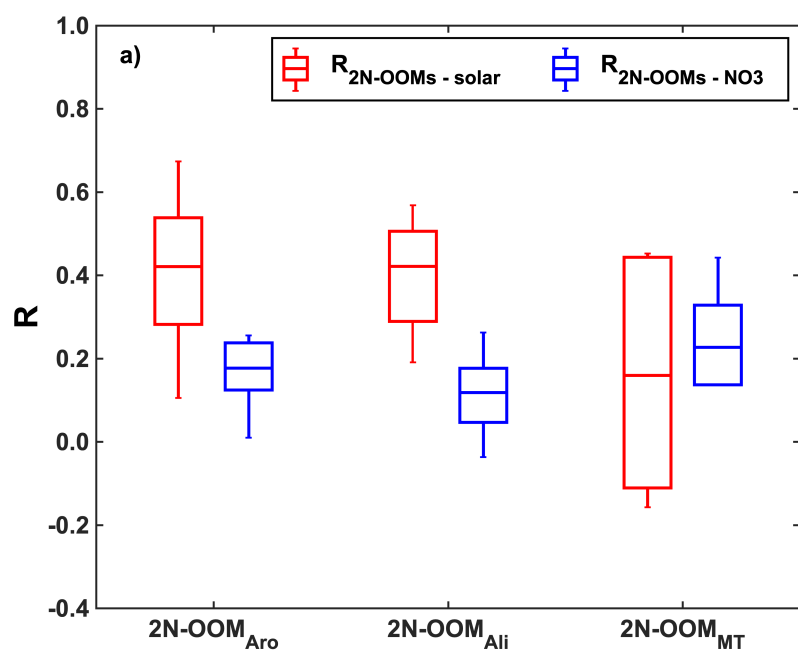

Figure 4a

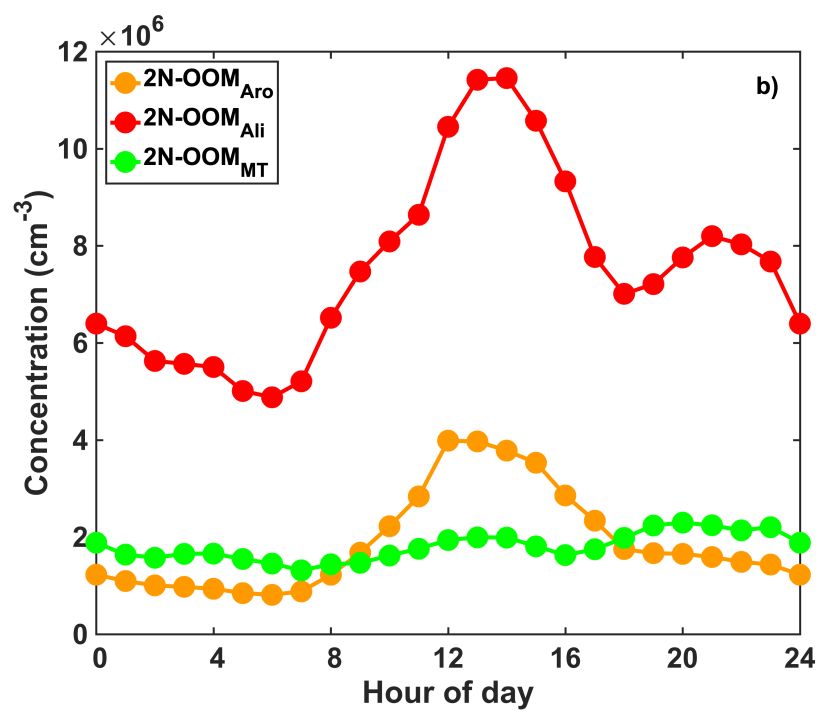

Figure 4b

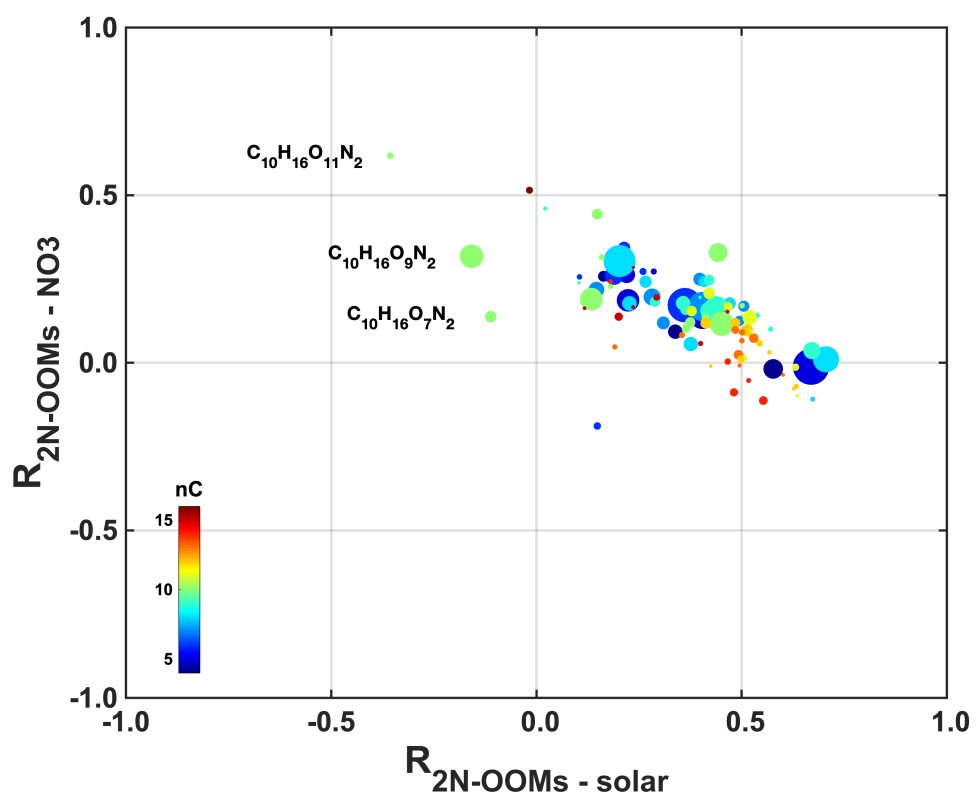

Figure 5

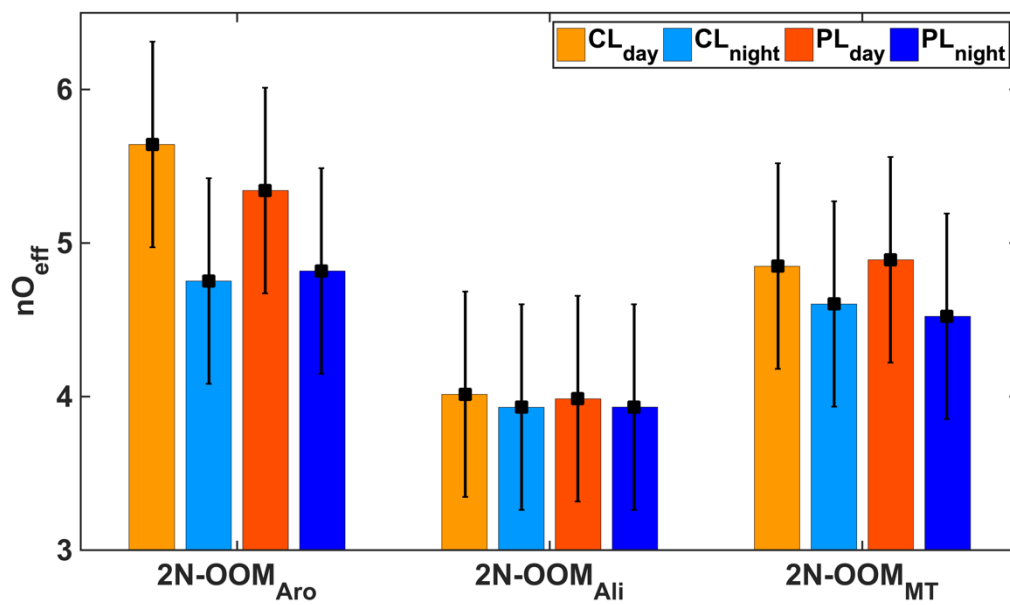

Figure 6

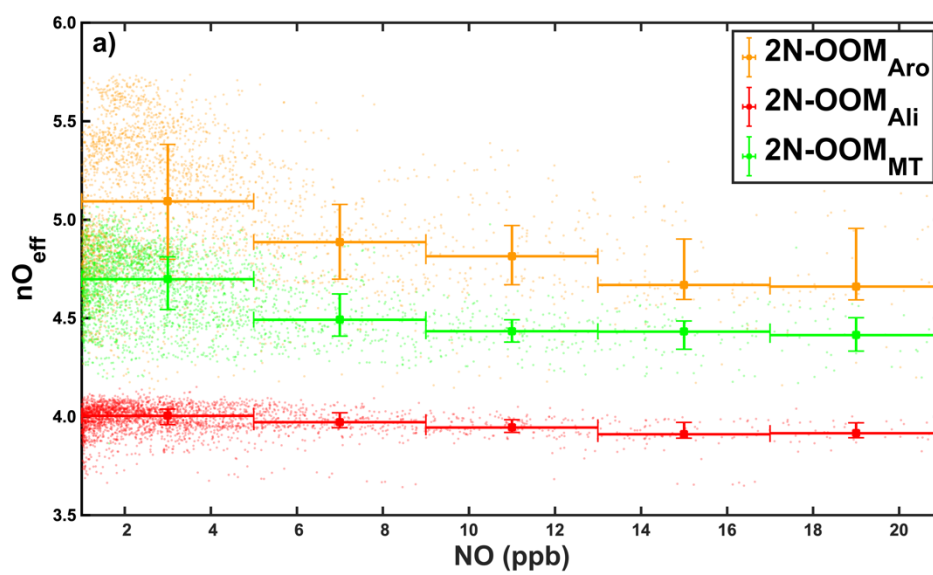

Figure 7a

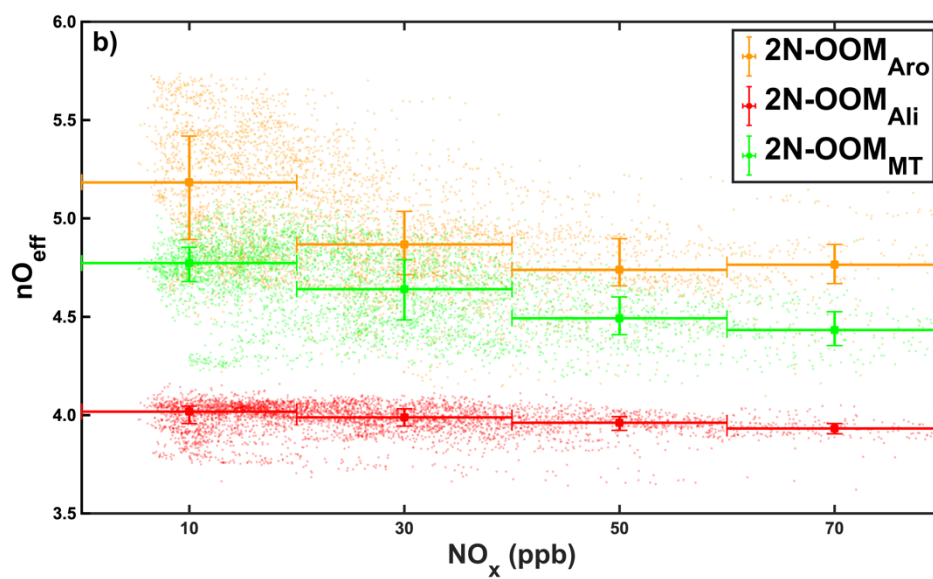

Figure 7b
